# Supplementary material
Source: Research Square preprint supplement (doi:10.21203/rs.3.rs-8792330/v1)
Supplement: Supplementary file 1 [file eb03823f3b7f8c2f3bf2db64.xlsx]

## Sheet: Sheet1
Final indicator data（2024年）
													Treatment	SS (%)	SSC (%)	VC (mg·100g⁻¹)	LC (mg·kg⁻¹)	SP (mg·g⁻¹)	HD (N)	FSI	TA (%)	NA (μg·g⁻¹)	Yield (t·hm⁻2)	WUE(kg·m⁻3)
排序	(%)SS	SSC(%)	VC(mg·100g^-1)	(mg·kg^-1)LC	(mg·g^-1)SP	(N)HD	FSI	(%)TA	(ug·g^-1)NA	Y(t·hm-2)	WUE（kg·m-3）		1	2.164	4.922	23.621	61.482	0.111	1.936	0.944	0.259	43.814	92.27	12.8
1	2.17	4.89	23.88	61.86	0.11	1.96	0.94	0.26	44.11	92.26	13.35		2	3.182	5.32	31.195	80.281	0.19	2.078	0.973	0.34	24.504	102.3	13.82
1	2.07857	4.80714	23.0081	60.6244	0.10829	1.88512	0.917196	0.256451	42.8822	93.76	12.48		3	3.852	6.189	36.702	122.985	0.291	2.007	0.959	0.443	21.458	86.41	16.71
1	2.24342	5.06804	23.9757	61.962	0.114536	1.96209	0.974722	0.260558	44.4498	90.79	12.57		4	3.37	5.388	34.556	96.287	0.25	1.887	0.921	0.388	18.909	78.71	21.7
2	3.15	5.29	31.33	79.57	0.19	2.09	0.97	0.34	24.75	107.14	13.82		5	3.452	4.481	19.738	57.743	0.182	1.914	0.901	0.29	22.96	87.16	10.71
2	3.1011	5.21868	30.3788	79.1604	0.180509	2.04009	0.96138	0.333153	23.8285	99.14	13.49		6	2.304	5.04	27.031	66.764	0.119	2.054	0.939	0.273	20.532	96.2	13.47
2	3.29503	5.45141	31.877	82.1131	0.198231	2.10466	0.988302	0.34615	24.9326	100.62	14.15		7	2.329	5.346	32.921	81.359	0.152	2.202	0.905	0.25	14.459	82.92	14.79
3	3.85	6.17	36.46	123.05	0.29	2.03	0.96	0.44	21.38	86.46	16.4		8	2.961	5.208	28.192	71.543	0.168	1.965	0.958	0.33	7.635	75.65	17.54
3	3.76047	5.92372	35.4422	120.488	0.28806	1.96055	0.93871	0.438431	20.6066	86.26	17.47
3	3.94699	6.4735	38.2036	125.417	0.294903	2.03039	0.97701	0.450097	22.3867	86.51	16.26
4	3.37	5.42	34.38	96.52	0.25	1.9	0.93	0.39	18.86	80.8	21.42
4	3.27763	5.20859	34.2889	94.9813	0.247833	1.83636	0.899865	0.3839	18.077	76.67	21.27
4	3.46371	5.53688	34.9987	97.3604	0.251974	1.9261	0.933156	0.390996	19.7895	78.67	22.4
5	3.46	4.46	19.79	58.21	0.18	1.92	0.91	0.29	22.83	88.7	10.56
5	3.31003	4.36738	18.8817	56.113	0.17834	1.88002	0.869777	0.284688	22.7927	89.27	10.38
5	3.58599	4.61654	20.5435	58.9053	0.188023	1.94053	0.924442	0.294319	23.2559	83.51	11.2
6	2.29	5.05	27.4	66.45	0.12	2.06	0.94	0.27	20.67	99.05	14.23
6	2.24105	4.9713	26.2056	64.7654	0.11639	2.0282	0.929077	0.267253	20.0829	97.3	13.12
6	2.3804	5.09908	27.4868	69.0775	0.120826	2.0734	0.948971	0.280643	20.8433	92.25	13.06
7	2.31	5.31	32.77	81.05	0.15	2.18	0.91	0.25	14.44	80.93	14.95
7	2.25648	5.18019	31.7765	77.9817	0.149302	2.15888	0.874479	0.237967	13.7759	84.77	14.94
7	2.41973	5.54806	34.215	85.0454	0.156962	2.26854	0.930389	0.260914	15.161	83.06	14.48
8	2.98	5.26	28.37	72.18	0.17	1.96	0.95	0.33	7.7	78.93	18
8	2.87274	5.05183	27.2134	70.0104	0.162829	1.93445	0.945265	0.319518	7.44499	73.27	17.89
8	3.03083	5.31186	28.9924	72.4375	0.172457	2.00009	0.980179	0.340851	7.76102	74.75	16.73
Final indicator data（2025年）
排序	(%)SS	SSC(%)	VC(mg·100g^-1)	(mg·kg^-1)LC	(mg·g^-1)SP	(N)HD	FSI	(%)TA	(ug·g^-1)NA	Y(t·hm-2)	WUE（kg·m-3）
1	2.6	4.61	22.49	60.36	0.1	1.83	0.89	0.23	37.05	92.62	10.79			排序	SS	SSC	VC	LC	SP	HD	FSI	TA	NA	Yield	WUE
	2.4755	4.45155	21.7418	58.6292	0.0963987	1.76862	0.852569	0.227453	37.0447	92.75	11.18			1	2.591	4.633	22.608	60.078	0.1	1.814	0.878	0.231	37.073	91.81	11.11
	2.69693	4.83886	23.5911	61.244	0.103139	1.84319	0.890606	0.234566	37.1245	90.05	11.36			2	3.349	4.742	31.456	75.859	0.155	1.878	0.949	0.232	21.61	97.32	11.72
2	3.4	4.8	31.77	76.33	0.16	1.9	0.96	0.24	21.85	99.15	11.3			3	4.031	5.608	35.904	121.81	0.288	1.847	0.959	0.378	19.992	87.96	12.8
	3.29849	4.69666	31.1579	73.9072	0.154794	1.86379	0.915591	0.236344	21.4411	99.53	12.36			4	3.619	4.873	34.602	89.287	0.222	1.875	0.903	0.322	17.107	77.83	19.07
	3.35	4.73	31.44	77.34	0.15	1.87	0.97	0.22	21.54	93.27	11.5			5	3.483	4.195	18.722	56.285	0.141	1.798	0.94	0.257	20.129	89.44	9.13
3	4.04	5.53	35.9	122.05	0.29	1.85	0.95	0.38	19.89	88.58	13.03			6	2.724	4.597	25.462	66.966	0.122	1.925	0.919	0.284	20.681	89.66	11.69
	4.00133	5.51258	35.303	116.528	0.276677	1.76088	0.937381	0.369757	19.7202	88.03	12.44			7	3.418	4.867	32.41	78.616	0.16	1.887	0.941	0.247	13.859	78.69	12.65
	4.05152	5.78187	36.5105	126.852	0.297967	1.92898	0.989441	0.385124	20.3665	87.28	12.93			8	3.219	4.766	28.606	71.178	0.158	1.831	0.934	0.3	9.639	72.76	14.37
4	3.56	4.89	34.05	89.69	0.22	1.81	0.89	0.32	16.97	74.97	18.06
	3.57637	5.01838	34.9352	89.63	0.226385	1.89597	0.910213	0.334752	17.2217	78.51	19.65
	3.72	4.71	34.82	88.54	0.22	1.92	0.91	0.31	17.13	80.01	19.5
5	3.44	4.16	18.9	56.73	0.14	1.8	0.95	0.26	20.36	89.03	9.13
	3.43785	4.0647	18.32	54.7218	0.138341	1.74358	0.917374	0.24722	19.4027	90.3	9.19
	3.57199	4.35991	18.9472	57.4045	0.14437	1.84921	0.954062	0.265008	20.6247	88.99	9.07
6	2.73	4.64	25.59	67.03	0.12	1.94	0.91	0.28	20.67	90.34	12.11
	2.67025	4.45702	24.6794	64.0677	0.119771	1.86893	0.908958	0.276989	19.9615	91.97	11.05
	2.77292	4.69298	26.1166	69.8001	0.124898	1.966	0.937947	0.293748	21.4102	86.66	11.91
